# Supplementary material
Source: PubMed Central journal article supplement (PMC2709101)
Supplement: NIHMS85555-supplement-01.pdf [file NIHMS85555-supplement-01.pdf]

**ONLINE Supplemental Figure 1:** Extensive examination of the breakpoint regions revealed an imbalance of chromosomal material at the molecular level. Sequence analysis of the Xq28 breakpoint revealed a 16 bp loss of chromosome X material, while a 36 bp deletion of

chromosome 1 material occurred at the 1q21 breakpoint. Additionally, a 93 bp duplication of chromosome 1 material was inserted into the der(X) breakpoint.
